# Supplementary material
Source: MDPI journal article supplement (https://www.mdpi.com/1424-2818/15/10/1100)
Supplement: s1 [file s1 › diversity-2644001-supplementary.pdf]

## Supporting information

### Figure S1-S7

#### Table S1-S2

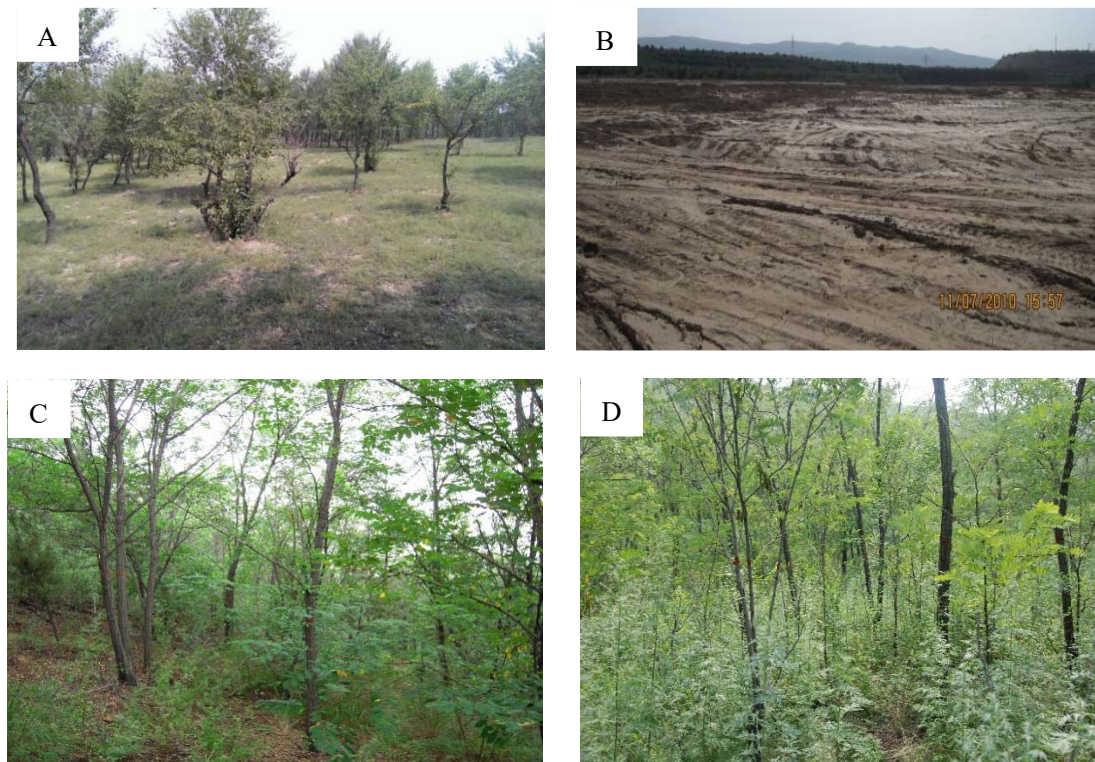

A: Original vegetation; B: Damaged vegetation; C: Site I; D: Site II

**Figure S1** Vegetation types before and after restoration

**Table S1.** Number of species surviving in the sample site

| Stand age/year | Site | <i>R</i> (plant/hm <sup>2</sup> ) | <i>P</i> (plant/hm <sup>2</sup> ) | Site | <i>R</i> (plant/hm <sup>2</sup> ) | <i>U</i> (plant/hm <sup>2</sup> ) | <i>A</i> (plant/hm <sup>2</sup> ) |
|----------------|------|-----------------------------------|-----------------------------------|------|-----------------------------------|-----------------------------------|-----------------------------------|
| 0              | I    | 2000                              | 240                               | II   | 3300                              | 3300                              | 3300                              |
| 17             |      | 1130                              | 184                               |      | 1789                              | 1063                              | 417                               |
| 22             |      | 1012                              | 270                               |      | 1362                              | 1266                              | 513                               |
| 27             |      | 1090                              | 187                               |      | 1079                              | 3306                              | 268                               |

*R* indicate *R. pseudoacacia*, *P* indicate *P. tabuliformis*, *U* indicate *U. pumila*, *A* indicate *A. altissima*

**Table S2.** Summary of restoration patterns by sample site

| Site | Restore Mode                                                    | Site Type | Average altitude/m | Restoration of the initial planting program                                                                    |
|------|-----------------------------------------------------------------|-----------|--------------------|----------------------------------------------------------------------------------------------------------------|
| I    | <i>R. pseudoacacia</i> – <i>P. tabuliformis</i>                 | Slope     | 1355               | Interplant in rows spaced 2 m apart, with acacia plants spaced 1 m apart and oleander plants spaced 5 m apart. |
| II   | <i>R. pseudoacacia</i> – <i>U. pumila</i> – <i>A. altissima</i> | Platform  | 1380               | The three species were planted in alternate rows with a spacing of 1m × 1m.                                    |

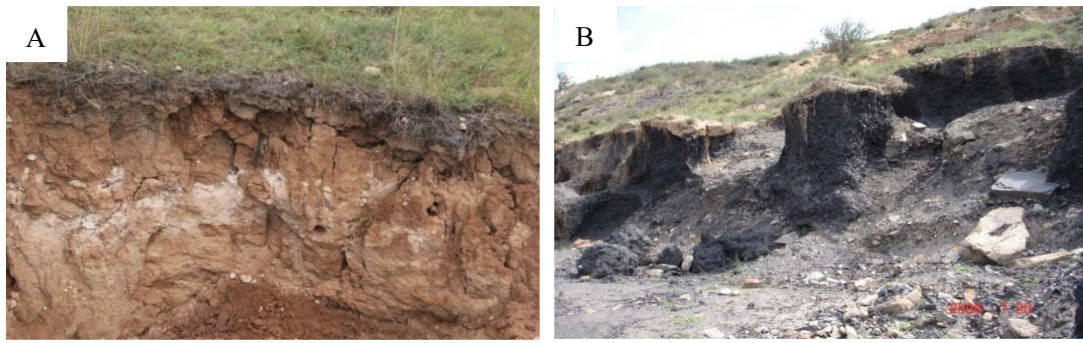

A: Original soil; B: Damaged soil  
Figure S2 Soil comparison before and after mining

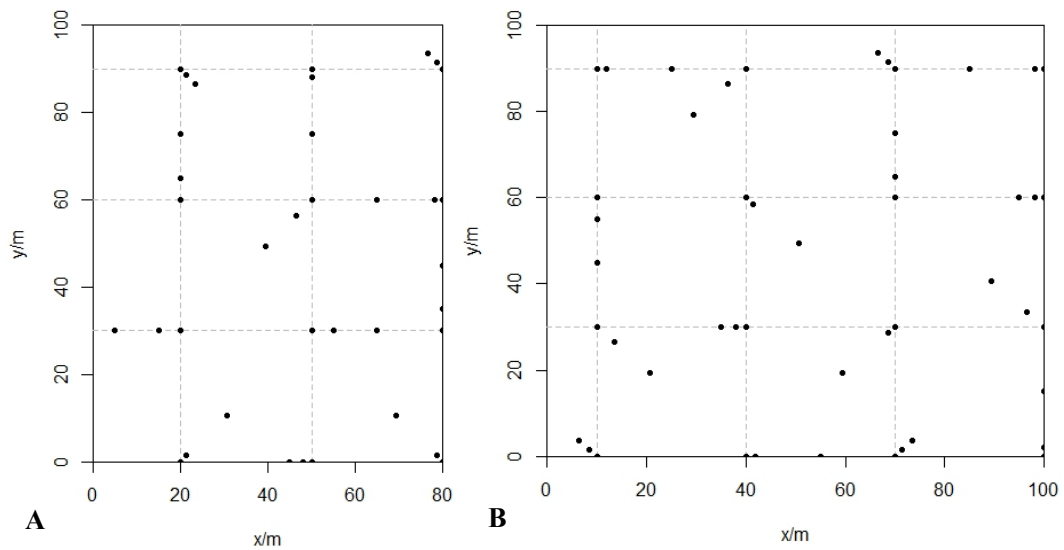

A: Site I; B: Site II  
Figure S3 The spatial distribution of soil samples in the site

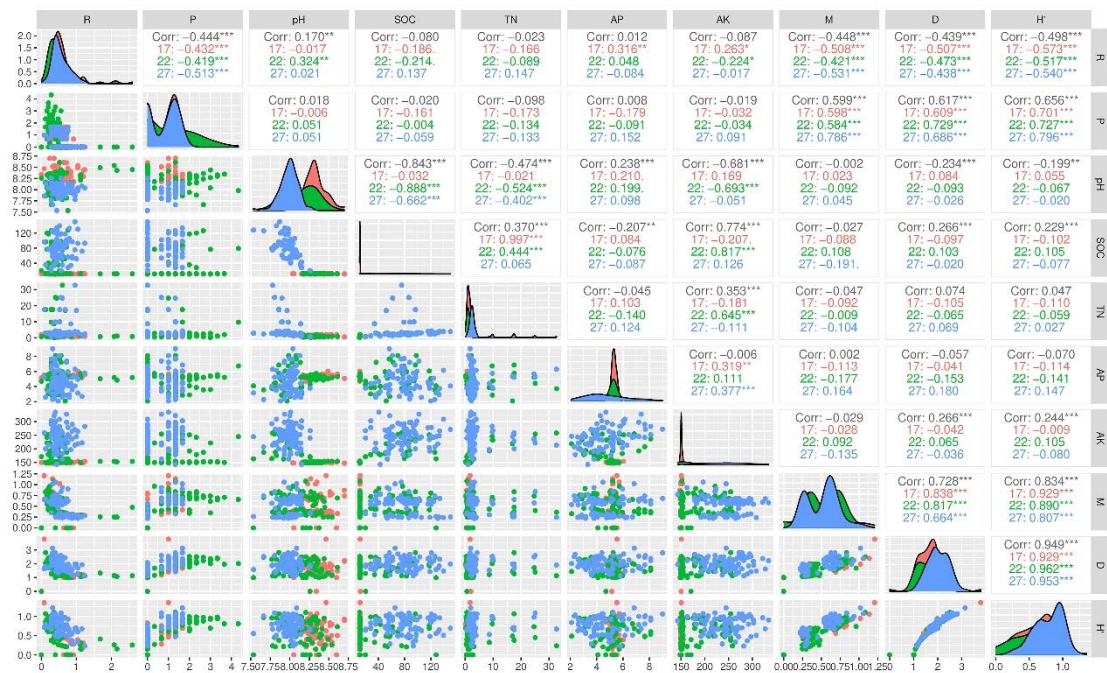

**Figure S4** Correlation between several species' survival rates and several parameters in various stand ages (Site I). The correlation coefficient for a stand age of 17 years is represented by red, the correlation coefficient for a stand age of 22 years is represented by green, and the correlation coefficient for a stand age of 27 years is represented by blue. \*\* and \* indicate statistically significant correlations at the 0.01 and 0.05 levels, respectively, the absence of \* indicates irrelevance. pH; SOM (g/kg); TN (g/kg); AP (mg/kg); AK (mg/kg). *R* indicate *R. pseudoacacia*, *P* indicate *P. tabuliformis*. *M* indicate *Margalef's index*, *D* indicate *Simpson's index*, *H'* indicate *Shannon-Wiener index*.

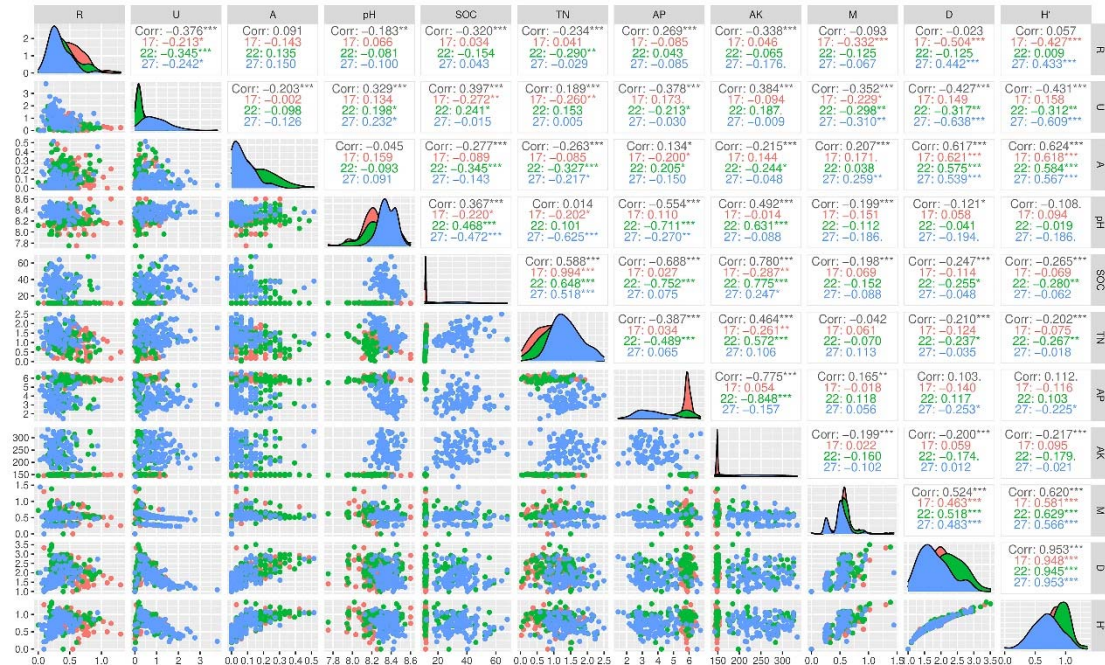

**Figure S5** Correlation between several species' survival rates and several parameters in various stand ages (Site I). The correlation coefficient for a stand age of 17 years is represented by red, the correlation coefficient for a stand age of 22 years is represented by green, and the correlation coefficient for a stand age of 27 years is represented by blue. \*\* and \* indicate statistically significant correlations at the 0.01 and 0.05 levels, respectively, the absence of \* indicates irrelevance. pH; SOM (g/kg); TN (g/kg); AP (mg/kg); AK (mg/kg). *R* indicate *R. pseudoacacia*, *P* indicate *P. tabuliformis*. *M* indicate *Margalef's index*, *D* indicate *Simpson's index*, *H'* indicate *Shannon-Wiener index*.

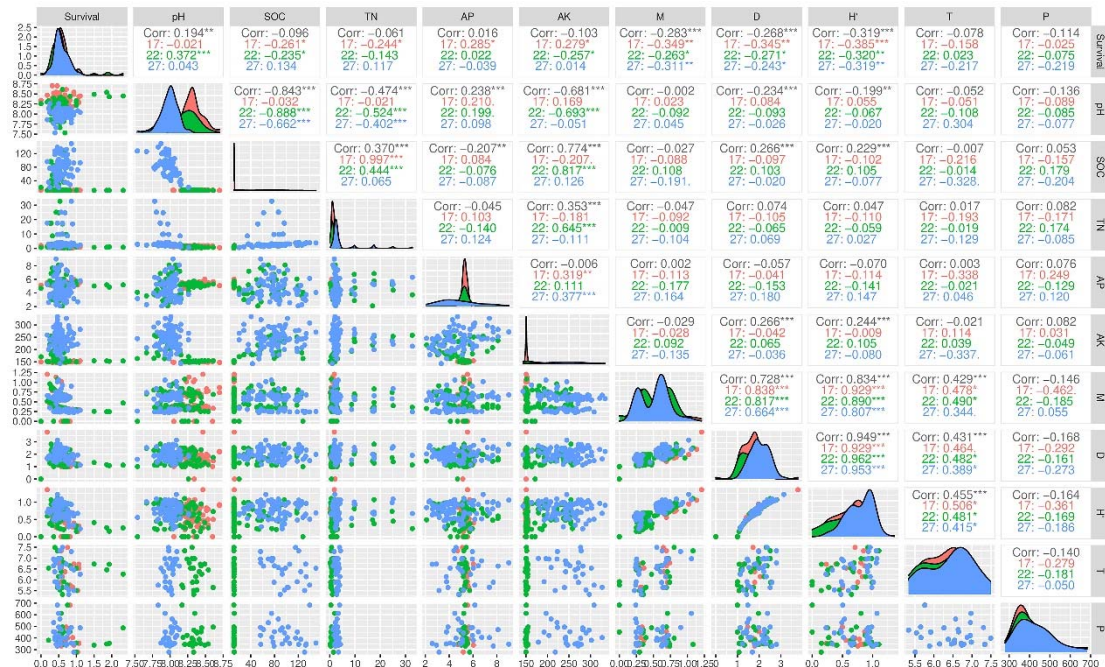

**Figure S6** Correlation between total survival rate and several parameters in various stand ages (Site II). The correlation coefficient for a stand age of 17 years is represented by red, the correlation coefficient for a stand age of 22 years is represented by green, and the correlation coefficient for a stand age of 27 years is represented by blue. \*\* and \* indicate statistically significant correlations at the 0.01 and 0.05 levels, respectively, the absence of \* indicates irrelevance. *P* indicate Precipitation (mm); *T* indicate Temperature (°C); pH; SOM (g/kg); TN (g/kg); AP (mg/kg); AK (mg/kg). *M* indicate *Margalef's index*, *D* indicate *Simpson's index*, *H'* indicate *Shannon-Wiener index*.

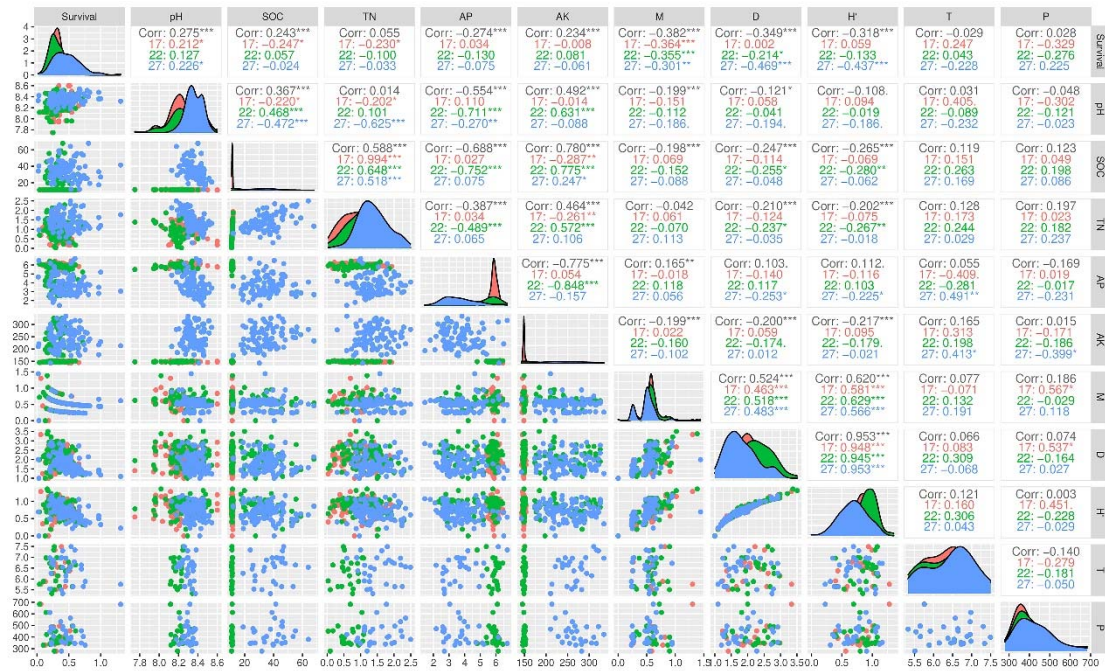

**Figure S7** Correlation between total survival rate and several parameters in various stand ages (Site II). The correlation coefficient for a stand age of 17 years is represented by red, the correlation coefficient for a stand age of 22 years is represented by green, and the correlation coefficient for a stand age of 27 years is represented by blue. \*\* and \* indicate statistically significant correlations at the 0.01 and 0.05 levels, respectively, the absence of \* indicates irrelevance. P indicate Precipitation (mm); T indicate Temperature (°C); pH; SOM (g/kg); TN (g/kg); AP (mg/kg); AK (mg/kg). *M* indicate *Margalef's index*, *D* indicate *Simpson's index*, *H'* indicate *Shannon-Wiener index*.
